# Supplementary material for: Photoluminescence, photocatalysis and Judd–Ofelt analysis of Eu3+-activated layered BiOCl phosphors
Source: Royal Society of Chemistry journal article supplement (doi:10.1039/c4ra10163d), 2014-12-02
Supplement: c4ra10163d1.pdf [file c4ra10163d1.pdf]

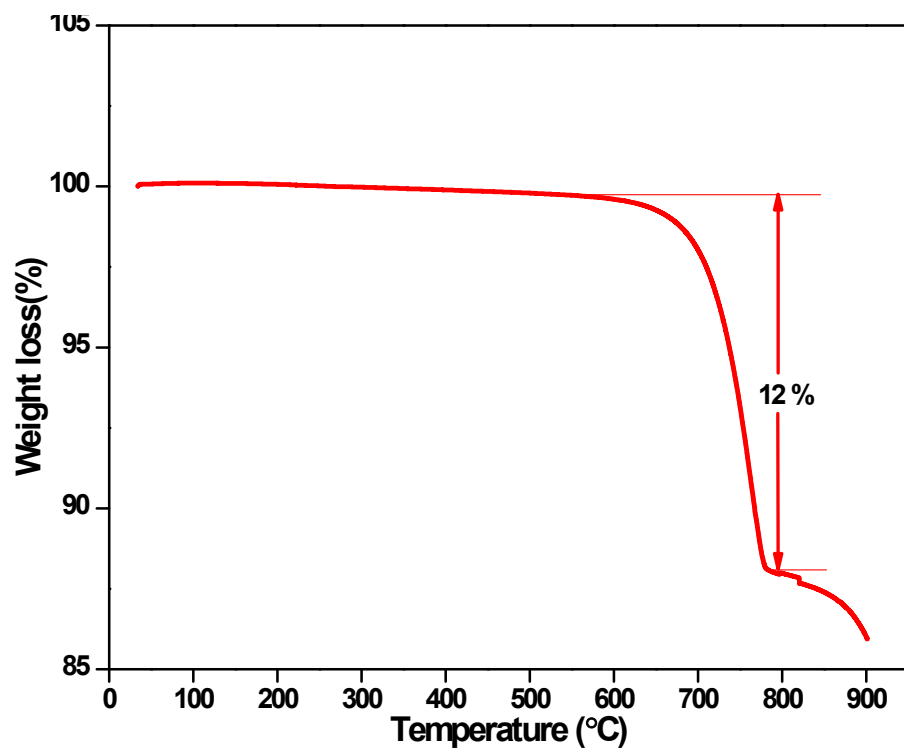

**Fig. S1.** TGA curve of BiOCl compound.

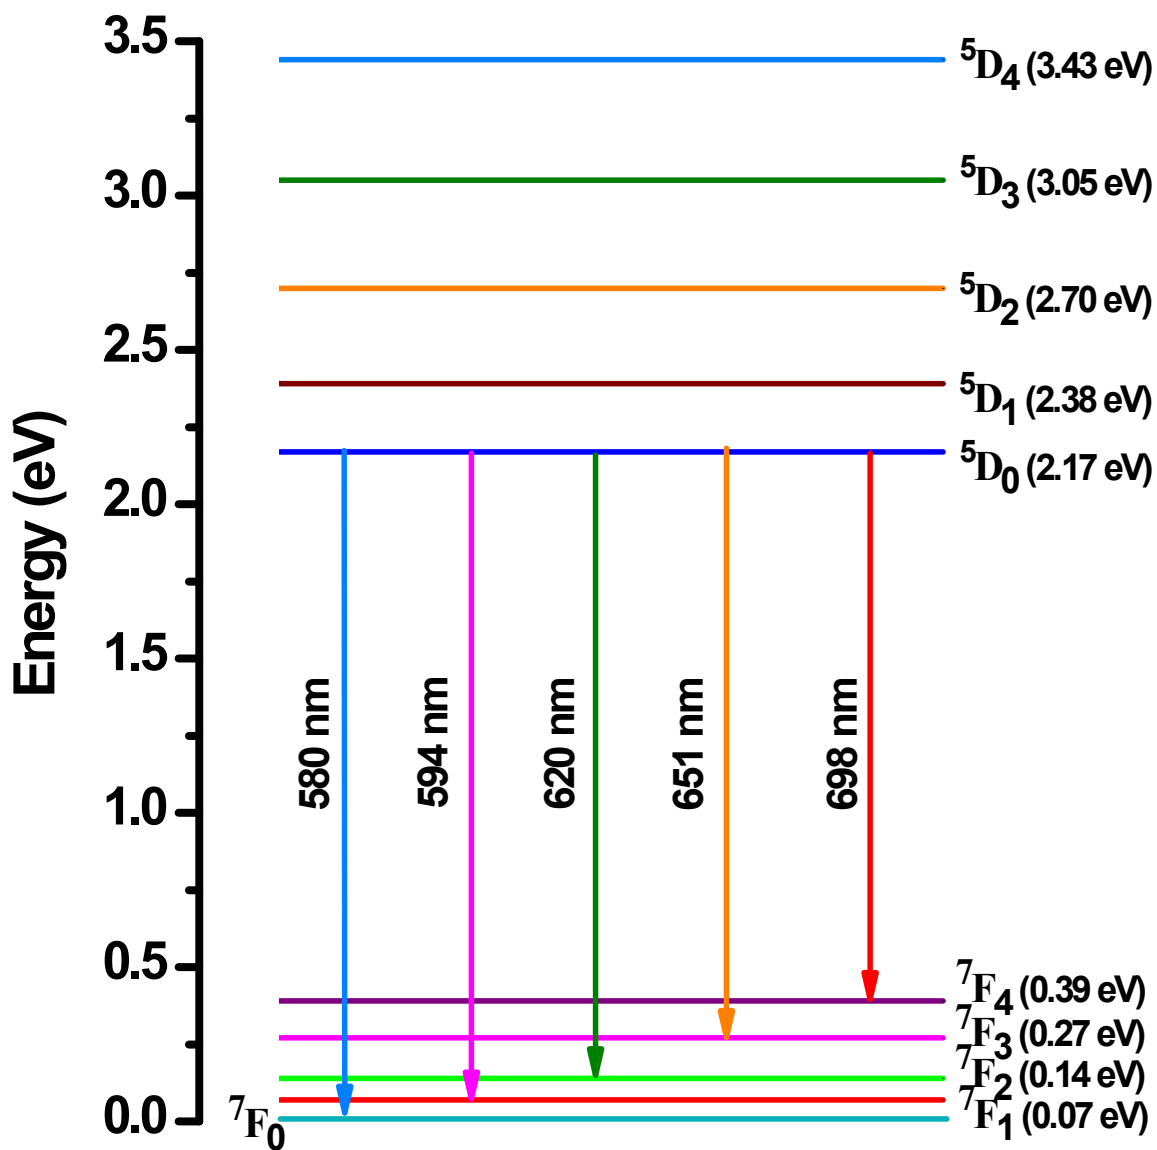

Fig. S2. Energy level diagram for  $\text{Eu}^{3+}$  ion in  $\text{Bi}_{1-x}\text{Eu}_x\text{OCl}$  phosphors.

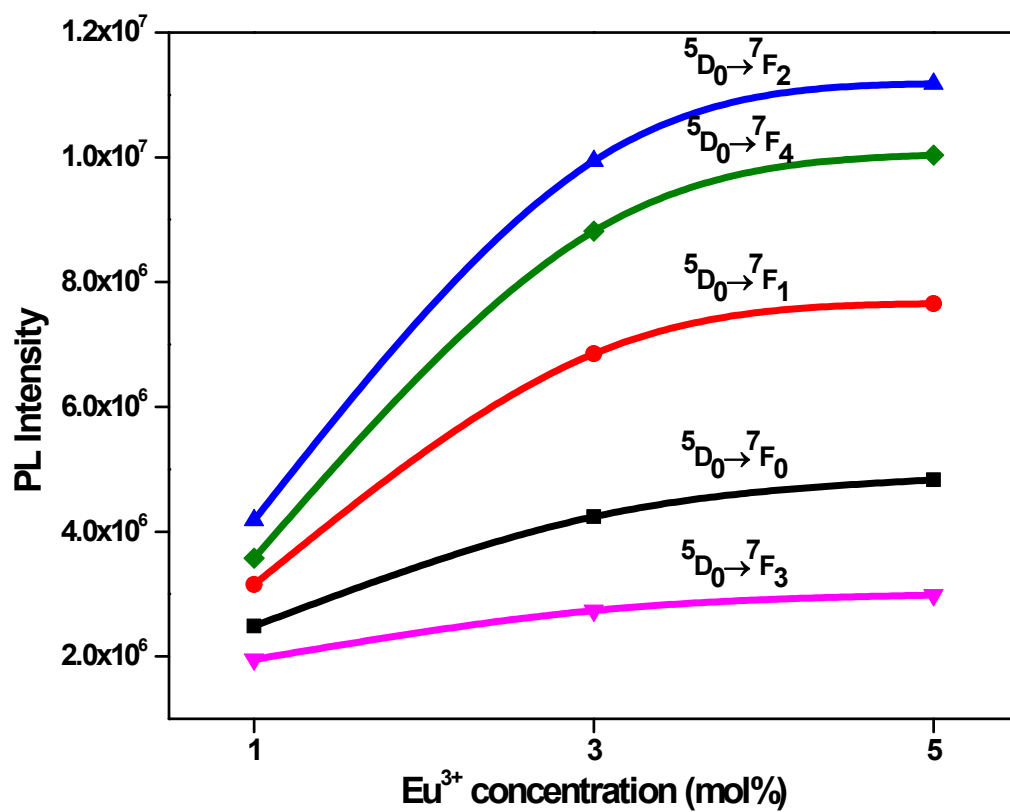

**Fig. S3.** Variation in the PL intensity with different transitions as a function of the  $\text{Eu}^{3+}$  ion concentration in  $\text{BiOCl}$ .
